# Supplementary material
Source: Research Square preprint supplement (doi:10.21203/rs.3.rs-8592276/v1)
Supplement: Supplementary file 1 [file 2cafe8351f91a2db1405e823.docx]

**Manuscript title: How Schools Can Narrow the Gender and Genetic Gaps in Educational Achievement**

**Authors**

Sverre Ofstad1, Perline A. Demange1, Qi Qin1, Rosa Cheesman1,2, Fartein Ask Torvik1,2,3, Eivind Ystrom1,2,4

1 PROMENTA Research Center, Department of Psychology, University of Oslo, Oslo, Norway

2 PsychGen Centre for Genetic Epidemiology and Mental Health, Division of Public Health and Prevention, Norwegian Institute of Public Health, Oslo, Norway

3 Centre for Fertility and Health, Norwegian Institute of Public Health, Oslo, Norway

4 Centre for Research on Equality in Education, Faculty of Educational Sciences, University of Oslo, Norway

Table of Contents

[Supplementary tables 3](#_Toc219195974)

[Supplementary Table S1. Model fit comparison 3](#_Toc219195975)

[Supplementary Table S2. Description of school-level missing data 4](#_Toc219195976)

[Supplementary table S3. Linear associations from candidate models 5](#_Toc219195977)

[Supplementary Table S4. Joint modelling of proportion of female teachers and teacher educational attainment 6](#_Toc219195978)

[Supplementary Table S5. Model estimates for the teacher turnover model with and without municipal population size 7](#_Toc219195979)

[Supplementary Table S6. Joint modelling of classroom-level GPA and proportion of girls 8](#_Toc219195980)

[Supplementary Table S7. Linear and non-linear associations from the candidate models. 9](#_Toc219195981)

[Supplementary Table S8. Gene-environment correlations with and without controlling for parental PGIs 11](#_Toc219195982)

[Supplementary Table S9. Factor loadings for positive school climate and externalizing behavior 12](#_Toc219195983)

[Supplementary Table S10. Exploratory factor analysis for externalizing behavior items 13](#_Toc219195984)

[Supplementary Table S11. Model-specification of the candidate environment models 14](#_Toc219195985)

[Supplementary Table S12. Confidence intervals around random effects correlations 15](#_Toc219195986)

[Supplementary Figures 16](#_Toc219195987)

[Supplementary Figure S1. Scree Plot for externalizing behavior 16](#_Toc219195988)

[Supplementary Figure S2. Effect on NonCog-intercept correlation when artificially censoring GPA 17](#_Toc219195989)

[Supplementary methods and results 18](#_Toc219195990)

[Deviations from pre-registration 18](#_Toc219195991)

[Identifying classroom IDs 18](#_Toc219195992)

[Factor analysis for positive school climate and externalizing behavior 19](#_Toc219195993)

[Positive school climate. 19](#_Toc219195994)

[Externalizing behavior. 19](#_Toc219195995)

[Group-mean centering 19](#_Toc219195996)

[Expected changes in slopes based on random effects 20](#_Toc219195997)

[Further model evaluations 20](#_Toc219195998)

[Supplementary methods and results reference list 21](#_Toc219195999)

# **Supplementary tables**

## Supplementary Table S1. Model fit comparison

| Model | Parameters | AIC | Log-Likelihood |
| --- | --- | --- | --- |
| null | 19 | 95541.76 | -47751.88 |
| gender | 23 | 95503.39 | -47728.69 |
| gender, NonCog | 26 | 95476.33 | -47712.16 |
| gender, NonCog, Cog | 30 | 95476.15 | -47708.07 |
| **gender, NonCog, gender × NonCog** | **30** | **95474.96** | **-47707.50** |
| gender, gender × Cog | 30 | 95552.93 | -47746.46 |
| gender, NonCog, gender × NonCog, Cog | 35 | 95476.24 | -47703.12 |
| gender, Cog, gender × Cog, NonCog | 35 | 95480.10 | -47705.05 |
| gender, Noncog, NonCog, gender × Cog, gender  × NonCog | 41 | 95484.96 | -47701.48 |

Note. Cog and NonCog = polygenic indexes for cognitive and non-cognitive skills respectively. The table provides the AIC and log-likelihood of all tested models. The first column indicates which terms are included as a random slope, where the null model only includes fixed effects. The row in bold indicates the best-fitting model, and includes random slopes for gender and gender-specific slopes for NonCog. Its random effects structure was specified in lmer as (1 + gender + NonCog + gender*NonCog | School_ID). Aspects of the model that were used in the analyses was further evaluated and supported in Supplementary Information

## Supplementary Table S2. Description of school-level missing data

| Variable | Missing Percent | Cor | Description |
| --- | --- | --- | --- |
| School SES | .000 | - | - |
| Teacher educational attainment | .007 | 0.017** | Unable to link schools to any teachers in the employment data. |
| Proportion of female teachers | .004 | -0.004 | Some missing school-level data in the first year of the COVID-pandemic, 2020. |
| Teacher turnover | .040 | 0.027*** | Unable to link schools to any teachers in the employment data. |
| School-level proportion of girls | .000 | - | - |
| Classroom-level proportion of girls | .11 | -0.023*** | Due to removing schools with fewer than two classrooms |
| Classroom GPA | .11 | -0.023*** |
| Externalizing behavior | .39 | 0.038*** | Schools not participating in the Ungdata student survey for the years a student was enrolled in that school |
| Positive school climate | .39 | 0.038*** |

*Note*. The cor column shows the point-biserial correlation between missingness and school-level GPA, ** p < .01, *** p <.001. The description column provides information about why the data is missing.

## Supplementary table S3. Linear associations from candidate models

| Model | Term | Estimate average | Estimate boys | Estimate girls | p.value gender-interaction |
| --- | --- | --- | --- | --- | --- |
| School-level SES | School SES | .115 (.096, .135) | .127 (.105, .148) | .104 (.083, .125) | 0.013 |
|  | School SES x NonCog | -.017 (-.031, -.004) | -.018 (-.037, 0) | -.016 (-.035, .002) | 0.881 |
|  | School SES x Cog | -.007 (-.02, .006) | .003 (-.016, .022) | -.016 (-.034, .002) | 0.153 |
| Classroom-level proportion of girls | Classroom gender | .028 (.018, .038) | .027 (.013, .041) | .029 (.015, .043) | 0.801 |
|  | Classroom gender x NonCog | .002 (-.013, .017) | 0 (-.02, .021) | .004 (-.016, .025) | 0.786 |
|  | Classroom gender x Cog | .006 (-.008, .021) | .011 (-.01, .031) | .002 (-.018, .022) | 0.551 |
| Classroom-level GPA | Classroom GPA | -.015 (-.025, -.005) | -.019 (-.033, -.005) | -.01 (-.024, .003) | 0.375 |
|  | Classroom GPA x NonCog | -.008 (-.022, .007) | .004 (-.017, .024) | -.019 (-.039, .001) | 0.124 |
|  | Classroom GPA x Cog | -.002 (-.016, .012) | -.006 (-.026, .014) | .002 (-.018, .021) | 0.594 |
| Teacher educational attainment | Teacher EA | .075 (.06, .089) | .089 (.071, .107) | .06 (.042, .078) | 0.008 |
|  | Teacher EA x NonCog | -.03 (-.045, -.016) | -.024 (-.045, -.003) | -.037 (-.058, -.016) | 0.405 |
|  | Teacher EA x Cog | -.015 (-.03, 0) | -.007 (-.028, .014) | -.023 (-.044, -.002) | 0.299 |
| Proportion of female teachers | Teacher gender | -.028 (-.041, -.015) | -.035 (-.052, -.019) | -.021 (-.037, -.004) | 0.156 |
|  | Teacher gender x NonCog | .01 (-.004, .024) | .017 (-.003, .037) | .003 (-.017, .024) | 0.357 |
|  | Teacher gender x Cog | .012 (-.002, .025) | .017 (-.003, .037) | .006 (-.013, .026) | 0.466 |
| Teacher turnover | Teacher turnover | .042 (.024, .06) | .049 (.029, .069) | .035 (.015, .054) | 0.133 |
|  | Teacher turnover x NonCog | -.003 (-.016, .011) | -.001 (-.021, .019) | -.004 (-.024, .015) | 0.797 |
|  | Teacher turnover x Cog | -.012 (-.026, .001) | -.009 (-.029, .011) | -.015 (-.034, .003) | 0.64 |
| School-level proportion of girls | Student gender | .022 (.011, .033) | .021 (.007, .036) | .023 (.009, .037) | 0.887 |
|  | Student gender x NonCog | -.014 (-.027, 0) | -.024 (-.043, -.004) | -.003 (-.022, .016) | 0.141 |
|  | Student gender x Cog | .007 (-.007, .021) | .009 (-.011, .029) | .005 (-.014, .024) | 0.746 |
| Positive school climate | Positive school climate | .045 (.03, .06) | .067 (.048, .086) | .022 (.004, .041) | <.001 |
|  | Positive school climate x NonCog | .005 (-.012, .022) | .018 (-.007, .042) | -.007 (-.032, .017) | 0.156 |
|  | Positive school climate x Cog | .001 (-.016, .017) | -.003 (-.028, .021) | .004 (-.019, .028) | 0.651 |
| Externalizing behavior | Ext.behavior | -.016 (-.031, -.001) | -.036 (-.055, -.018) | .005 (-.014, .023) | 0.001 |
|  | Ext.behavior x NonCog | -.005 (-.022, .012) | -.012 (-.036, .012) | .002 (-.023, .026) | 0.442 |
|  | Ext.behavior x Cog | -.011 (-.028, .006) | -.01 (-.035, .014) | -.011 (-.035, .013) | 0.956 |

*Note.* The table provides interactions between each candidate environment model and gender, and the polygenic index for cognitive (Cog) and non-cognitive skills (NonCog) on student grade point average (GPA). In the analysis, gender was effect-coded and group-mean centered, so the column marked “estimate average” reflects the average effect across both genders. Brackets indicate 95% confidence intervals. The column “p.value gender interaction” denotes the two-sided p.value for the interaction term between the environment and gender.

## Supplementary Table S4. Joint modelling of proportion of female teachers and teacher educational attainment

| Term | Estimate (95% CI) | |
| --- | --- | --- |
|  | Separate models | Joint model |
| Proportion of female teachers (boys) | -.035 (-.052, -.019) | -.027 (-.045, -.009) |
| Proportion of female teachers (girls) | -.021 (-.037, -.004) | -.015 (-.031, .002) |
| Teacher educational attainment (boys) | .089 (.071, .107) | 086 (.068, .104) |
| Teacher educational attainment (girls) | .06 (.042, .078) | 059 (.041, .077) |
| Proportion of female teachers × NonCog | .01 (-.004, .024) | -.007 (-.007, .022) |
| Proportion of female teachers × Cog | .012 (-.002, .025) | .011 (-.003, .025) |
| Teacher educational attainment × NonCog | -.03 (-.045, -.016) | -.03 (-.045, -.015) |
| Teacher educational attainment × Cog | -.015 (-.03, 0) | -.012 (-.03, .003) |

*Note*. The table compares results from a model that includes both proportion of female teachers and teacher educational attainment (joint model) in the same model to estimates from the models where these variables are modelled separately (separate models). Point estimates remain largely the same, signalling no considerable mediation effects. Cog = polygenic index for cognitive skills. NonCog = polygenic index for non-cognitive skills.

## Supplementary Table S5. Model estimates for the teacher turnover model with and without municipal population size

| Term | Estimate (95% CI) | |
| --- | --- | --- |
|  | Without municipal population size | With municipal population size |
| Teacher turnover (boys) | .048 (.028, .069) | .011 (-.012, .033) |
| Teacher turnover (girls) | .038 (.017, .058) | -.002 (-.024, .021) |
| Teacher turnover × NonCog | -.002 (-.016, 0.013) | .156 (.139, .172) |
| Teacher turnover × Cog | -.012 (-.026, .001) | .192 (.176, .208) |
| Population size | - | .113 (.094, .132) |

*Note*. The table compares the teacher turnover model with and without the inclusion of municipal population size. This variable was created by linking demographic data from Statistics Norway with school and municipality IDs. The variable represents the number of people who lived in the school’s municipality the year the student attended the school. The model was specified by adding municipal population size to the teacher turnover model. Municipal population size was also interacted with gender, both PGIs and both parental PGIs. GPA = grade point average. Cog = polygenic index for cognitive skills. NonCog = polygenic index for non-cognitive skills.

## Supplementary Table S6. Joint modelling of classroom-level GPA and proportion of girls

| Term | Estimate (95% CI) | |
| --- | --- | --- |
|  | Separate models | Joint model |
| Classroom-level Proportion of girls (boys) | 027 (.013, .041) | .030 (.016, .045) |
| Classroom-level Proportion of girls (girls) | 030 (.016, .043) | .031 (.017, .046) |
| Classroom-level GPA (boys) | -.019 (-.033, -.006) | -.024 (-.037, -.010) |
| Classroom-level GPA (girls) | -.011 (-.24, .003) | -.015 (-.029, -.001) |
| Classroom-level GPA × NonCog | -.008 (-.022, .006) | -.008 (-.022, .006) |
| Classroom-level GPA × Cog | -.002 (-.016, .012) | -.004 (-.018, .010) |
| Classroom-level Proportion of girls × NonCog | 002 (-.011, .017) | .003 (-.012, .018) |
| Classroom-level Proportion of girls × Cog | .006 (-.009, .022) | .007 (-.008, .022) |

*Note*. The table compares results from a model that includes both classroom-level GPA and classroom-level proportion of girls (joint model) in the same model to estimates from the models where these variables are modelled separately (separate models). Point estimates remain largely the same, signalling that the way in which these two classroom-aspects affect achievement are largely independent. GPA = grade point average. Cog = polygenic index for cognitive skills. NonCog = polygenic index for non-cognitive skills.

## Supplementary Table S7. Linear and non-linear associations from the candidate models.

| Model | Term | Estimate average | Estimate boys | Estimate girls | p.value gender-interaction |
| --- | --- | --- | --- | --- | --- |
| School-level SES | School SES | .102 (.083, .122) | .112 (.089, .134) | .093 (.071, .114) | 0.069 |
|  | School SES2 | .04 (.026, .053) | .042 (.027, .057) | .037 (.023, .052) | 0.52 |
|  | School SES x NonCog | -.019 (-.035, -.004) | -.023 (-.045, -.001) | -.016 (-.037, .005) | 0.666 |
|  | School SES x Cog | -.002 (-.018, .013) | .013 (-.009, .034) | -.017 (-.039, .004) | 0.055 |
|  | School SES2 x NonCog | .002 (-.008, .012) | .004 (-.01, .018) | 0 (-.014, .014) | 0.758 |
|  | School SES2 x Cog | -.006 (-.016, .004) | -.014 (-.028, 0) | .002 (-.012, .016) | 0.122 |
| Classroom-level proportion of girls | Classroom gender | .031 (.02, .042) | .033 (.018, .049) | .029 (.014, .044) | 0.671 |
|  | Classroom gender2 | -.005 (-.012, .002) | -.008 (-.017, .001) | -.001 (-.01, .008) | 0.233 |
|  | Classroom gender x NonCog | -.003 (-.019, .013) | -.007 (-.03, .016) | .001 (-.021, .022) | 0.613 |
|  | Classroom gender x Cog | .007 (-.008, .023) | .012 (-.01, .035) | .002 (-.019, .024) | 0.529 |
|  | Classroom gender2 x NonCog | .002 (-.007, .011) | .01 (-.003, .022) | -.006 (-.018, .007) | 0.079 |
|  | Classroom gender2 x Cog | -.001 (-.01, .008) | -.002 (-.014, .011) | 0 (-.012, .011) | 0.896 |
| Classroom-level GPA | Classroom GPA | -.015 (-.025, -.005) | -.019 (-.033, -.006) | -.01 (-.024, .004) | 0.355 |
|  | Classroom GPA2 | .003 (-.004, .01) | .003 (-.006, .012) | .003 (-.006, .013) | 0.976 |
|  | Classroom GPA x NonCog | -.008 (-.022, .006) | .005 (-.016, .025) | -.021 (-.041, -.001) | 0.082 |
|  | Classroom GPA x Cog | -.003 (-.017, .011) | -.007 (-.027, .013) | .002 (-.018, .022) | 0.532 |
|  | Classroom GPA2 x NonCog | -.009 (-.018, 0) | -.005 (-.018, .008) | -.013 (-.026, .001) | 0.437 |
|  | Classroom GPA2 x Cog | .002 (-.006, .011) | .006 (-.006, .018) | -.001 (-.014, .011) | 0.4 |
| Teacher educational attainment | Teacher EA | .081 (.066, .095) | .095 (.077, .113) | .066 (.048, .084) | 0.008 |
|  | Teacher EA2 | .014 (.007, .022) | .015 (.006, .025) | .013 (.004, .023) | 0.753 |
|  | Teacher EA x NonCog | -.031 (-.046, -.016) | -.025 (-.046, -.003) | -.037 (-.058, -.016) | 0.421 |
|  | Teacher EA x Cog | -.014 (-.029, 0) | -.006 (-.027, .015) | -.022 (-.043, -.001) | 0.294 |
|  | Teacher EA2 x NonCog | -.001 (-.011, .009) | -.007 (-.021, .007) | .004 (-.01, .019) | 0.281 |
|  | Teacher EA2 x Cog | .007 (-.002, .017) | .008 (-.006, .022) | .007 (-.007, .021) | 0.93 |
| Proportion of female teachers | Teacher gender | -.029 (-.042, -.015) | -.038 (-.054, -.021) | -.02 (-.036, -.003) | 0.084 |
|  | Teacher gender2 | 0 (-.006, .007) | -.005 (-.014, .003) | .006 (-.002, .015) | 0.043 |
|  | Teacher gender x NonCog | .004 (-.007, .015) | 0 (-.015, .015) | .007 (-.008, .023) | 0.499 |
|  | Teacher gender x Cog | .001 (-.01, .011) | -.003 (-.019, .012) | .005 (-.01, .02) | 0.47 |
|  | Teacher gender2 x NonCog | -.003 (-.012, .005) | -.013 (-.025, -.001) | .007 (-.005, .019) | 0.025 |
|  | Teacher gender2 x Cog | -.006 (-.014, .003) | -.001 (-.013, .011) | -.01 (-.021, .002) | 0.307 |
| School-level proportion of girls | Student gender | .02 (.009, .032) | .022 (.007, .037) | .018 (.003, .033) | 0.652 |
|  | Student gender2 | -.004 (-.008, -.001) | -.004 (-.009, .002) | -.005 (-.01, 0) | 0.711 |
|  | Student gender x NonCog | -.005 (-.016, .005) | -.007 (-.022, .007) | -.004 (-.018, .011) | 0.708 |
|  | Student gender x Cog | .002 (-.008, .012) | .008 (-.007, .022) | -.003 (-.018, .011) | 0.288 |
|  | Student gender2 x NonCog | -.004 (-.01, .001) | -.008 (-.016, 0) | -.001 (-.008, .006) | 0.201 |
|  | Student gender2 x Cog | -.002 (-.008, .004) | -.002 (-.01, .006) | -.002 (-.01, .006) | 0.987 |
| Positive school climate | Positive school climate | .046 (.03, .061) | .068 (.048, .087) | .024 (.005, .043) | <.001 |
|  | Positive school climate2 | .005 (-.005, .015) | 0 (-.013, .013) | .01 (-.002, .023) | 0.19 |
|  | Positive school climate x NonCog | -.003 (-.015, .01) | -.002 (-.02, .015) | -.003 (-.02, .015) | 0.971 |
|  | Positive school climate x Cog | .003 (-.009, .015) | .009 (-.009, .026) | -.003 (-.02, .014) | 0.347 |
|  | Positive school climate2 x NonCog | -.004 (-.016, .007) | -.022 (-.039, -.006) | .014 (-.003, .03) | 0.003 |
|  | Positive school climate2 x Cog | -.002 (-.013, .009) | -.006 (-.022, .011) | .002 (-.014, .018) | 0.507 |
| Externalizing behavior | Ext.behavior | -.019 (-.036, -.003) | -.04 (-.061, -.019) | .002 (-.019, .023) | 0.001 |
|  | Ext.behavior2 | .002 (-.004, .008) | .003 (-.005, .011) | .002 (-.006, .009) | 0.783 |
|  | Ext.behavior x NonCog | .004 (-.01, .017) | .004 (-.015, .023) | .004 (-.015, .023) | 0.991 |
|  | Ext.behavior x Cog | -.008 (-.021, .006) | -.007 (-.027, .012) | -.008 (-.027, .011) | 0.959 |
|  | Ext.behavior2 x NonCog | 0 (-.007, .007) | -.002 (-.012, .009) | .002 (-.008, .012) | 0.599 |
|  | Ext.behavior2 x Cog | -.002 (-.01, .005) | -.002 (-.014, .01) | -.003 (-.013, .007) | 0.888 |
| Teacher turnover | Teacher turnover | .04 (.019, .06) | .046 (.023, .07) | .033 (.011, .056) | 0.202 |
|  | Teacher turnover2 | .002 (-.002, .007) | .004 (-.004, .012) | .001 (-.003, .005) | 0.486 |
|  | Teacher turnover x NonCog | -.002 (-.016, .013) | .004 (-.017, .025) | -.007 (-.028, .013) | 0.454 |
|  | Teacher turnover x Cog | -.014 (-.029, .001) | -.009 (-.031, .012) | -.019 (-.039, .001) | 0.523 |
|  | Teacher turnover2 x NonCog | -.002 (-.009, .004) | -.007 (-.016, .002) | .002 (-.008, .012) | 0.189 |
|  | Teacher turnover2 x Cog | .001 (-.006, .008) | .001 (-.011, .014) | .001 (-.004, .006) | 0.973 |

*Note.* The table provides interactions between the squared terms for each candidate environment and gender, for polygenic index for cognitive (Cog) and non-cognitive skills (NonCog) on student grade point average (GPA). The table also includes the linear interactions as including squared terms led to small changes in some of the linear associations. In the analysis, gender was effect-coded and group-mean centered, so the column marked “estimate average” reflects the average effect across both genders. Brackets indicate 95% confidence intervals. The column “p.value gender interaction” denotes the p.value for the interaction term between the environment and gender.

## Supplementary Table S8. Gene-environment correlations with and without controlling for parental PGIs

| Model | NonCog | Noncog with parental | Cog | Cog with  parental |
| --- | --- | --- | --- | --- |
| School-level SES | .083 (.073, .093) | -.008 (-.018, .003) | .067 (.057, .078) | .009 (-.002, .019) |
| Classroom-level proportion of Girls | .002 (-.009, .013) | .001 (-.01, .012) | -.008 (-.019, .003) | 0 (-.011, .011) |
| Classroom-level GPA | .012 (.001, .023) | .009 (-.002, .019) | .005 (-.006, .016) | .001 (-.01, .012) |
| Teacher Educational Attainment | .052 (.041, .062) | .003 (-.008, .013) | .042 (.031, .052) | -.001 (-.012, .009) |
| Teacher Female proportion | -.009 (-.02, .002) | .011 (0, .021) | -.009 (-.02, .001) | -.005 (-.015, .006) |
| Teacher Turnover | .022 (.011, .032) | .005 (-.006, .015) | .021 (.011, .032) | 0 (-.01, .011) |
| School-level Proportion of Girls | .01 (0, .021) | .004 (-.006, .015) | .005 (-.005, .016) | -.005 (-.015, .006) |
| Positive School Climate | .035 (.022, .048) | .018 (.005, .031) | .008 (-.006, .021) | -.002 (-.015, .012) |
| Externalizing Behavior | -.014 (-.027, -.001) | -.011 (-.024, .002) | -.005 (-.018, .008) | -.003 (-.016, .01) |

*Note.* the table provides standardized regression coefficients for the relationship between childrens’ PGIs and the candidate environments from models with and without parental PGIs. Brackets display 95% confidence intervals.

## Supplementary Table S9. Factor loadings for positive school climate and externalizing behavior

| Item name | Item | Standardized Loading (SE) |
| --- | --- | --- |
| **Positive school climate** | | |
| skole1 | I enjoy being at school | 0.78 (0.007) |
| skole2 | I often dread going to school | 0.81 (0.005) |
| skole3 | I get bored at school | 0.83 (0.004) |
| skole4 | My teachers care about me | 0.60 (0.007) |
| skole6 | I feel that I fit in among the students at school | 0.81 (0.004) |
| **Externalizing behavior** | | |
|  | How many times have you done any of these the past year? |  |
| atfpro25 | Been in a fight | 0.55 (0.059) |
| atfpro18 | Been away all night without your parents knowing where you were | 0.67 (0.057) |
| atfpro12 | Purposely destroyed windows, bus seats, mailboxes or similar (engaged in vandalism) | 0.84 (0.070) |
| atfpro15 | Spray-painted or tagged illegally on walls, buildings, trains, buses or similar | 0.78 (0.045) |
| atfpro30 | Carried a knife or other weapons with you in places where it is not allowed | 0.72 (0.058) |
| atfpro31 | Hacked, swindled someone, or behaved in other criminal activity online | 0.66 (0.034) |

*Note.* The table provides the standardized factor loadings for the two uni-dimensional models fit to each scale. A full description of all items can be found at [https://surveybanken.sikt.no/en/study/7ae7f902-ddde-4bd8-8311-21f16ce93fdf/ undefined?type=studyMetadata&file=9c72d168-67ae-4c15-82d9-738535771af9_4](https://surveybanken.sikt.no/en/study/7ae7f902-ddde-4bd8-8311-21f16ce93fdf/%20undefined?type=studyMetadata&file=9c72d168-67ae-4c15-82d9-738535771af9_4).

## Supplementary Table S10. Exploratory factor analysis for externalizing behavior items

| Item name | Factor loadings | | | |
| --- | --- | --- | --- | --- |
| item | Factor 1 | Factor 2 | Factor 3 | Factor 4 |
| vold4 | 0.02 | -0.04 | 0.07 | 0.52 |
| vold3 | 0.02 | -0.03 | 0.05 | 0.85 |
| vold2 | 0.01 | 0.10 | 0.00 | 0.66 |
| mobb3 | -0.03 | 0.80 | 0.09 | -0.02 |
| atfpro11 | 0.35 | 0.16 | 0.37 | -0.06 |
| **atfpro31** | **0.46** | **-0.02** | **0.36** | **-0.10** |
| **atfpro30** | **0.83** | **-0.10** | **-0.07** | **-0.03** |
| **atfpro25** | **0.73** | **0.14** | **-0.37** | **0.14** |
| atfpro16 | -0.25 | -0.07 | 0.75 | 0.10 |
| **atfpro18** | **0.47** | **-0.03** | **0.30** | **0.03** |
| **atfpro15** | **0.53** | **-0.08** | **0.39** | **0.06** |
| mobb2 | -0.18 | 1.09 | -0.08 | 0.04 |
| skolprob4 | 0.08 | 0.21 | 0.51 | -0.01 |
| mobb1 | 0.24 | 0.61 | 0.05 | -0.01 |
| **atfpro12** | **0.82** | **-0.06** | **0.07** | **0.01** |
| atfpro1 | 0.13 | 0.04 | 0.72 | -0.01 |

Note. Factor loadings from exploratory factor analysis with promax rotation (maximum likelihood extraction) of 17 externalizing behavior items aggregated at the school level. Factor 1-4 represent the four extracted factors. Loadings ≥ 0.40 indicate salient factor-item relationships. Rows in bold were selected for inclusion in the final uni-dimensional scale, and show salient factor loadings on Factor 1, and lower than salient loadings on the other factors. A full description of all items can be found at [https://surveybanken.sikt.no/en/study/7ae7f902-ddde-4bd8-8311-21f16ce93fdf/ undefined?type=studyMetadata&file=9c72d168-67ae-4c15-82d9-738535771af9_4](https://surveybanken.sikt.no/en/study/7ae7f902-ddde-4bd8-8311-21f16ce93fdf/%20undefined?type=studyMetadata&file=9c72d168-67ae-4c15-82d9-738535771af9_4).

## Supplementary Table S11. Model-specification of the candidate environment models

| Candidate environment | Random intercept structure | Group-mean centering | School type |
| --- | --- | --- | --- |
| Classroom-level GPA | Classroom/school/year | Classroom | - |
| Classroom-level proportion  of girls | Classroom/school/year | Classroom | - |
| Externalizing behavior | School/year | School/year | - |
| School-level SES | School | School | - |
| School-level proportion of girls | School/year | School/year | - |
| Teacher educational attainment | School/year | School/year | Included |
| Proportion of female teachers | School/year | School/year | Included |
| Teacher turnover | School | School | Included |
| Positive school climate | School/year | School/year | - |

*Note.* Column “school type” indicates whether or not the model specification included the variable school type, denoting whether or not the school was a 1-10 or 8-10 grade school. These models were specified in lme4 as: GPA ~ NonCog * Gender * candidate environment + Cog * Gender * candidate environment + Cog_parental * Gender * candidate environment + NonCog_parental * Gender * candidate environment + Cog_parental * Cog * Gender + NonCog_parental * NonCog * Gender + NonCog_parental * Cog * Gender + NonCog_parental * NonCog * Gender + school_type + (1 | Family ID) + (1 | Random intercept). In this specificaiton, “Random intercept” refers to the specific random intercept structure of each model, found in column “Random intercept structure”. The variables were group-mean centered accordingly.

## Supplementary Table S12. Confidence intervals around random effects correlations

| Random effects correlation | Estimate | 85% CI | 95% CI |
| --- | --- | --- | --- |
| NonCog-Gender (boys) | -0.028 | (-0.051, -0.005) | (-0.060, 0.004) |
| NonCog-Gender (girls) | -0.001 | (-0.022, 0.015) | (-0.028, 0.021) |
| NonCog-Gender (gender-difference) | -0.027 | (-0.051, 0.002) | (-0.060, 0.012) |
| NonCog-intercept (boys) | -0.042 | (-0.054, -0.031) | (-0.058, -0.026) |
| NonCog-intercept (girls) | -0.019 | (-0.029, -0.009) | (-0.033, -0.005) |
| NonCog-intercept gender-difference | -0.023 | (-0.039, -0.008) | (-0.044, -0.003) |
| Gender-intercept | 0.033 | (0.025, 0.041) | (0.022, 0.044) |

*Note.* Columns with gender-difference provides the difference between boys and girls for that specific correlation, with corresponding confidence intervals. Conventional 95% confidence intervals (CIs), as well as 85% CIs that more accurately reflect the AIC model selection procedure are provided. The gender-specific correlations were calculated according to the formulas provided on SI p. 20. CIs were made with parametric bootstrapping using the bootMer function with 20,000 iterations.

# **Supplementary Figures**

## Supplementary Figure S1. Scree Plot for externalizing behavior


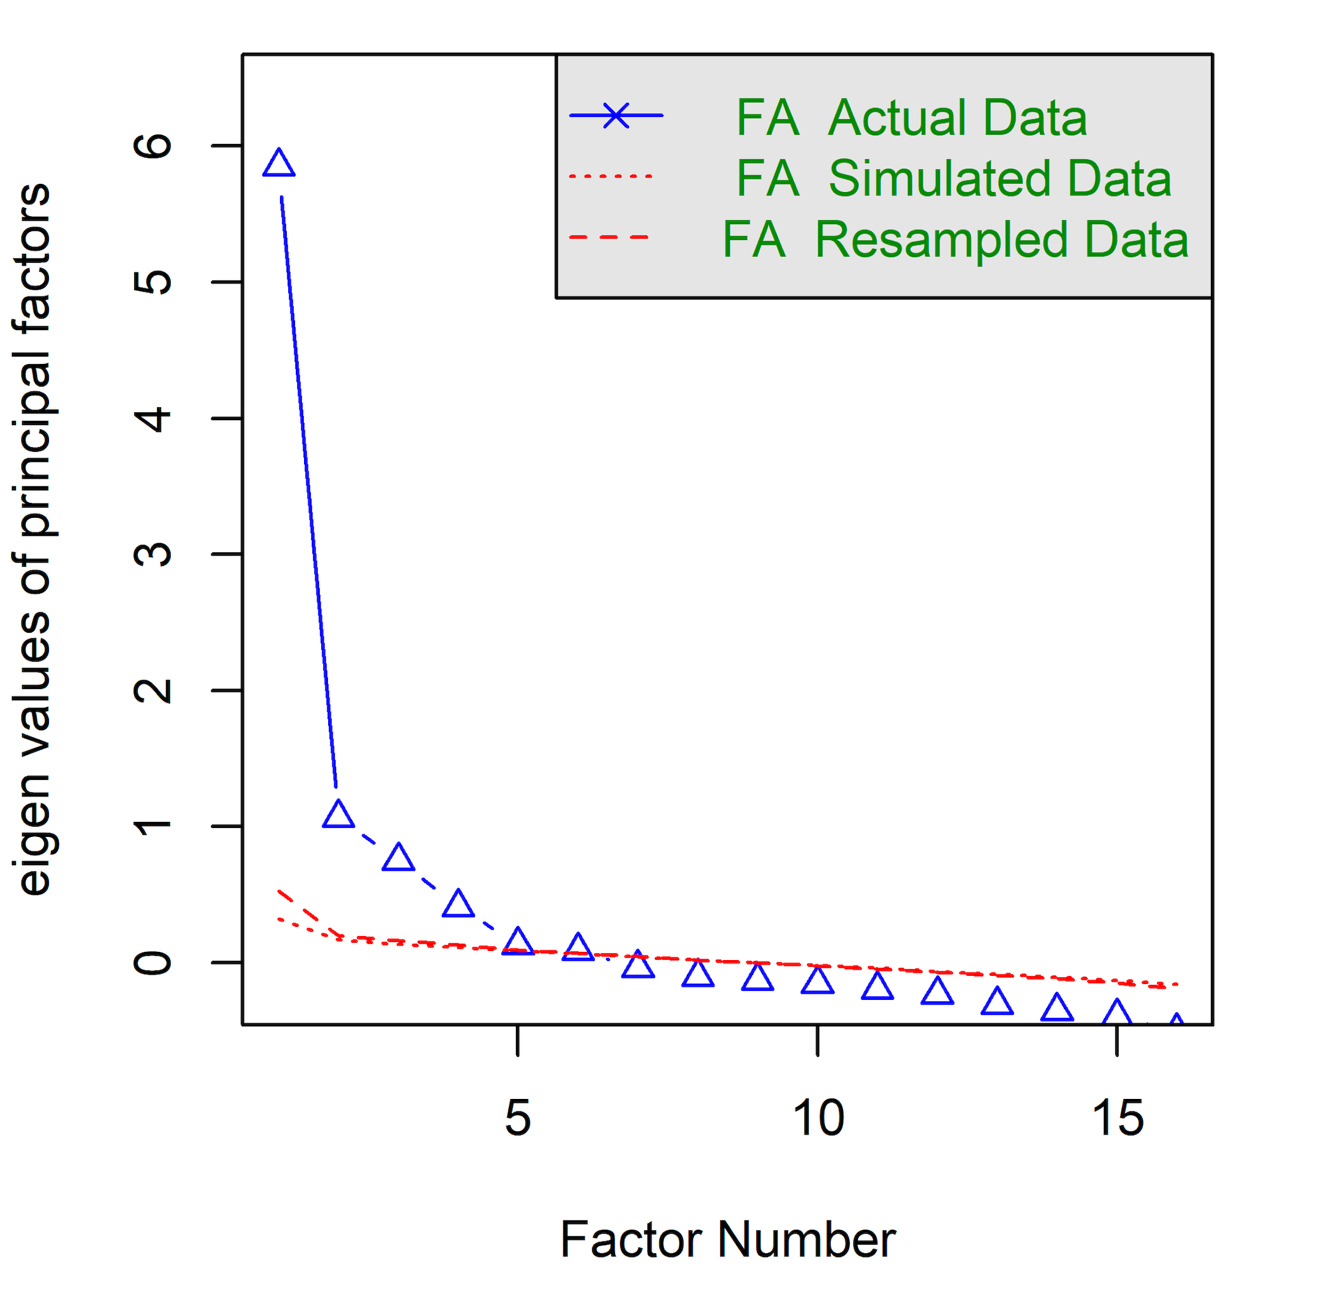


*Note*. Scree plot from exploratory factor analysis (EFA) of 12 externalizing behavior items averaged at the school level. The plot displays eigenvalues for the actual data (blue solid line with triangles) compared to simulated data (red dotted line) and resampled data (red dashed line) from parallel analysis. Results suggest a four-factor solution, as the first four eigenvalues from the actual data exceed those from the simulated and resampled datasets.

## Supplementary Figure S2. Effect on NonCog-intercept correlation when artificially censoring GPA


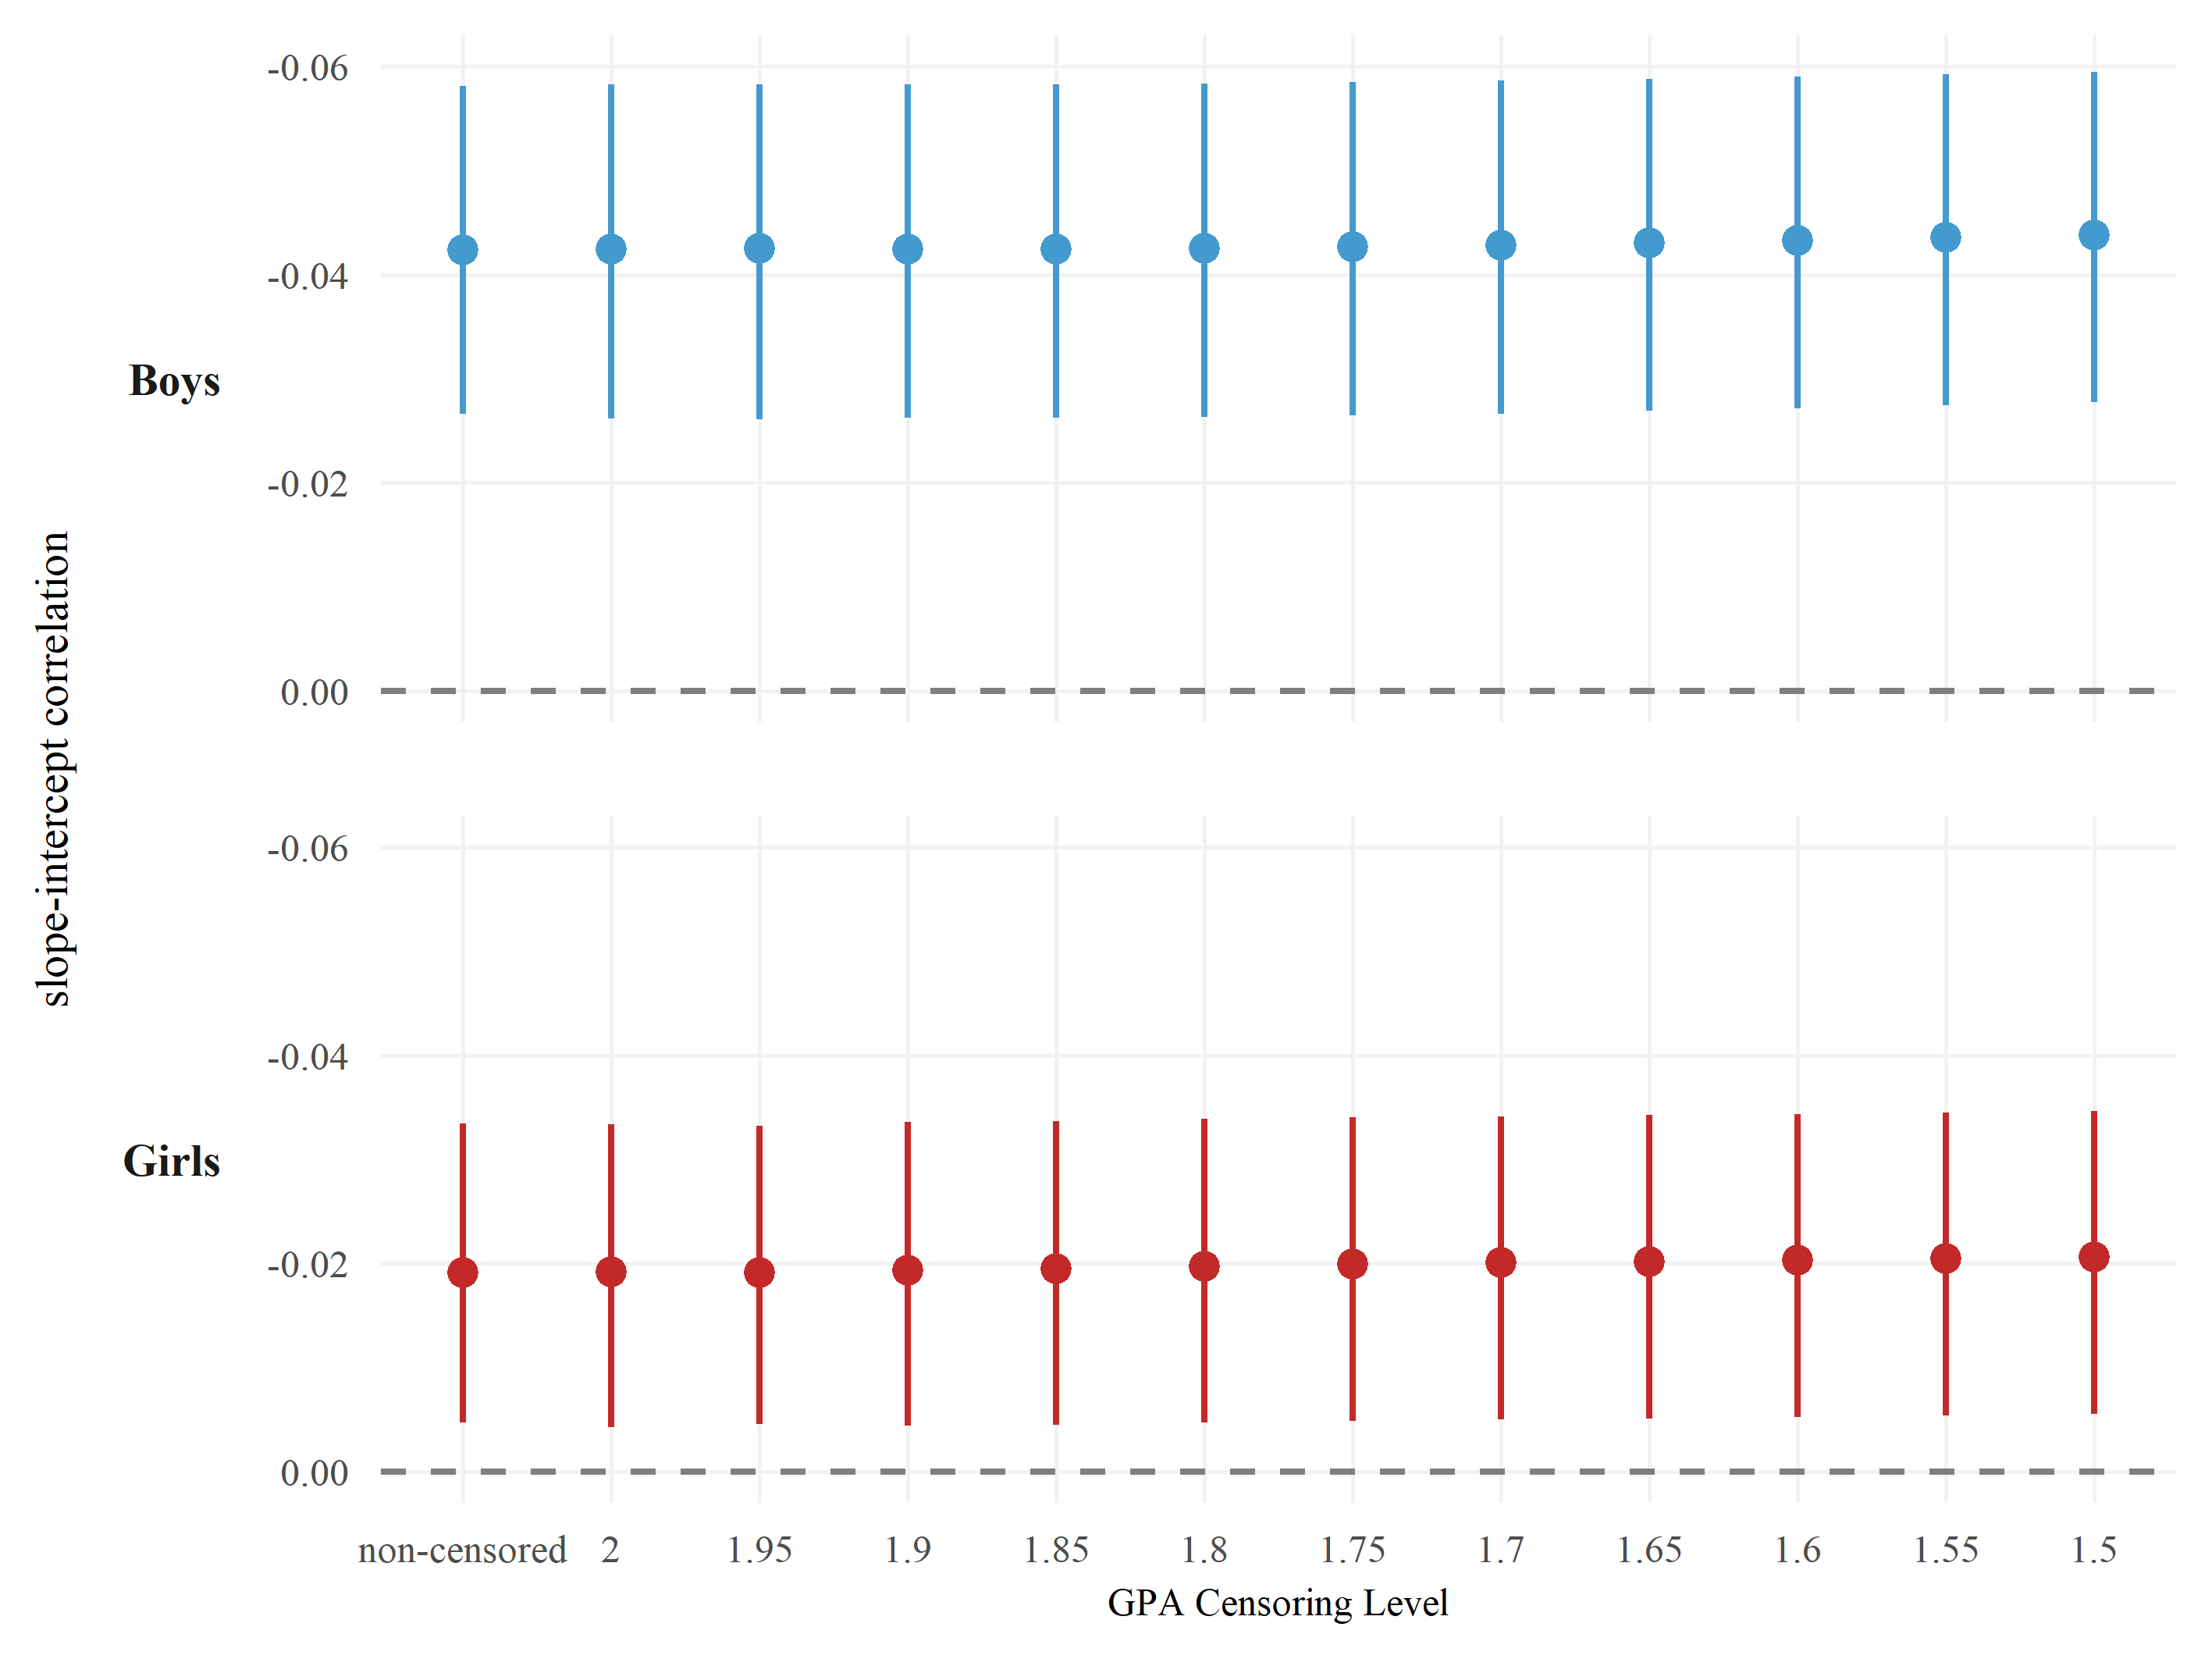


The figure shows the correlation between the random slope for the polygenic index (PGI) for non-cognitive skills and the random intercept across different censoring levels. There were only small increases in the strength of the correlation for both genders when further censoring the data, signalling that the correlation is unbiased by censoring effects. This conclusion is further supported by the absence of any meaningful correlation between the random slope for the cognitive skills-PGI and the intercept.

# **Supplementary methods and results**

## Deviations from pre-registration

Minor deviations from the pre-registration (<https://osf.io/3596r/files/xjs69>) were made.

We initially planned to use the missing indicator method to assess the degree to which missing data in the school environment variables affected our estimates. However, the literature shows that this technique is biased in unpredictable ways, even when the data is MCAR1,2. We therefore instead opted to describe the missing data pattern in the supplementary materials.

We included the estimation of the gender-stratified null model because it allowed us to estimate gender-specific sensitivity to school environments while accounting for gender-differences in GPA variance.

Some adjustments were made to include random intercepts that capture more unobserved heterogeneity and to group-mean center accordingly. We initialized planned to group-mean center all individual-level variables on school-means. However, in the models where we looked at year-specific effects, we chose to further group-mean centered gender on each school-year combination. Although the distribution of gender across schools is largely random (Extended Data Fig. 3), this allowed us to study pure within-school-year effects.

In the models where we examined year-specific effects, we also nested student GPA within each school-year combination instead of schools. The intercept for these models thus account for unobserved heterogeneity across both school environments and year. Lastly, in the classroom models, we added random intercepts for classrooms, nested in schools, and gender was further group-mean centered to the classroom-level.

Instead of including variables related to the genotyping process in the models, we opted for a two-step approach where we first residualized the PGIs on these covariates and then used the residualized PGIs in the models. The variables related to the genotyping process, by definition, correlate with year and geography. Including them as covariates in our models could therefore introduce unpredictable controls. This issue would be further exacerbated by our model specification, where we interacted the PGIs and gender with all other covariates.

The original exclusion criteria for classrooms (exclude student groupings of 20% below the median classroom size) was too lenient. For instance, this approach would flag a school with student groupings of 4,4,4,22,22 to have 5 distinct classrooms, although such a school most likely only has two classrooms. We therefore applied a stricter criteria (removed group IDs that were shared by less than 10 students).

## Identifying classroom IDs

Assignment of students into classrooms is managed by the schools themselves, although there are laws restricting the circumstances under which certain students can be placed in specific classrooms. Most importantly, classrooms are not to be divided according to ethnicity, student academic levels, or gender3, and so school-specific deviations in classroom-level GPA or proportion of girls are largely random.

Classroom IDs was obtained from administrative records on 9th grade national test scores. Students in the same classroom take the test at the same time, providing a unique ID numbers for classrooms. Since we wanted to study within-school differences in classroom effects, we first selected schools with at least two classrooms. If a student or group of students are absent when the class participates in the test, they will take it at some time later, receiving their own unique group ID4. To avoid identifying these groups as classrooms, we removed group IDs with fewer than 10 students. Lastly, when calculating the classroom-level variables, we removed students who did not have the same school ID between 9th and 10th grade, indicating that they had moved to another school.

## Factor analysis for positive school climate and externalizing behavior

Positive school climate.We reverse coded items where higher values indicates a negative school climate, and specified a uni-dimensional model using the lavaan R package with full information maximum likelihood. An initial model fit and subsequent modification indexes showed that there were considerable residual correlations between items “I enjoy being at school” and “I feel that I fit in among the students at school” (MI = 52) as well as the items “I often dread going to school” and “I get bored at school” (MI = 41). We therefore allowed residual correlations between these items.

Although the RMSEA was somewhat high, the overall fit was deemed acceptable (TLI = .97, SRMR = .02, RMSEA = .11). Based on this model, we calculated factor scores for each school using the lavPredict function with the Empirical Bayes modal method. Factor loadings were high for all items (Supplementary Table S9).

Externalizing behavior.We included all items pertaining to externalizing behavior that had less than 50% missing data. An initial scree plot suggested that despite a strong uni-dimensional factor, four factors fitted the data the best (Supplementary Figure 1). We estimated an exploratory factor analysis (EFA) by using the psych R package, with maximum likelihood and promax rotation. We selected the items with a salient factor loading of λ > .40 on the first factor (Supplementary Table S10) which also showed lower loadings on the other factors.

We fitted a uni-dimensional model to the six retained items from the EFA, using the lavaan R package with maximum likelihood. The model showed overall decent fit (TLI = .94, SRMR = .04, RMSEA = .09).

## Group-mean centering

The PGIs were group-mean centered around the school-specific sample means so that they reflect within-school deviations5. Gender was centered within schools based on the gender proportions in the entire school student body, rather than only among students included in the analytic sample, to accurately reflect the gender composition of the school environment. Gender was centered around schools, school-year combinations or at the classroom-level, according to the random intercept structure (Supplementary Table S11).

The classroom-level predictors were centered around the population means of each school-year combination. This approach enabled us to examine within-school differences in classroom characteristics even when only one classroom per school was sampled.

PGIs were centered around the school-means in every model, even in models were schools were also nested within year. Centering the PGIs on school-year means was not possible because when further dividing schools into years, many schools ended up having only one student. However, as we control for parental PGIs, the students’ PGIs are largely randomly distributed across school environments (Supplementary Table S8), minimizing the need for a more detailed centering-approach.

## Expected changes in slopes based on random effects

The expected changes in the association between predictors and GPA can be calculated as functions of the random effects by using the random effects covariance matrix and variance/covariance rules. The following calculations were employed in our analysis. As gender was effect-coded (-1 for girls and +1 for boys), the ± notation indicates subtraction for girls and addition for boys, yielding gender-specific expected changes in slopes.

**SD of the NonCog-PGI**

**Change in the slope of NonCog per unit of the intercept**

**Change in the slope of gender per unit of the intercept**

**Change in the slope of NonCog per unit of the random slope for gender**

## Further model evaluations

**Censoring for GPA.** To examine whether ceiling effects affected interactions between GPA and the NonCog-PGI, we re-estimated the best-fitting random effects model with different levels of artificial censoring of GPA. GPA was censored in jumps of .05 to 2, down to 1.5 standard deviations. We then examined the degree to which the gender-specific slopes were affected for different censoring levels. The analysis indicates that censoring had a negligible effect on the interaction terms (Supplementary Figure S2).

**Gender-specific slopes for NonCog-PGI.** Since the improvement in fit was small when adding gender-specific slopes for NonCog (ΔAIC = 1.37), we performed an additional analysis to further evaluate the support for the gender-specific slopes of NonCog. We computed confidence intervals for the gender-specific correlation between the intercept and random slope for the NonCog-PGI. We provide 95% CIs, as well as 85% confidence intervals that more accurately reflects the AIC model comparisons procedure6 (Supplementary Table S12). We found strong support that both the slopes of boys and girls were negatively correlated with the intercept, and that these correlations differed meaningfully. There was also support for the moderation of the NonCog-GPA association for boys as a function of the random slope for gender, although this support was weaker.

## Supplementary methods and results reference list

1. Knol, M. J. *et al.* Unpredictable bias when using the missing indicator method or complete case analysis for missing confounder values: an empirical example. *J. Clin. Epidemiol.* **63**, 728–736 (2010).

2. Van Smeden, M., Groenwold, R. H. H. & Moons, K. Gm. A cautionary note on the use of the missing indicator method for handling missing data in prediction research. *J. Clin. Epidemiol.* **125**, 188–190 (2020).

3. Norwegian Directorate for Education and Training. Opplæringslova. https://www.udir.no/regelverkstolkninger/opplaring/lov-om-grunnskoleopplaringa-og-den-vidaregaande-opplaringa-opplaringslova/ (2024).

4. The Norwegian Directorate for Education and Training. Administrere nasjonale prøver. https://www.udir.no/eksamen-og-prover/prover/nasjonale-prover/administrere-nasjonale-prover2/ (2025).

5. Enders, C. K. & Tofighi, D. Centering predictor variables in cross-sectional multilevel models: a new look at an old issue. *Psychol. Methods* **12**, 121–138 (2007).

6. Sutherland, C. *et al.* Practical advice on variable selection and reporting using Akaike information criterion. *Proc. R. Soc. B Biol. Sci.* **290**, 20231261.
